# Supplementary material
Source: PubMed Central journal article supplement (PMC2884175)
Supplement: NIHMS107734-supplement-Supp_1.pdf [file NIHMS107734-supplement-Supp_1.pdf]

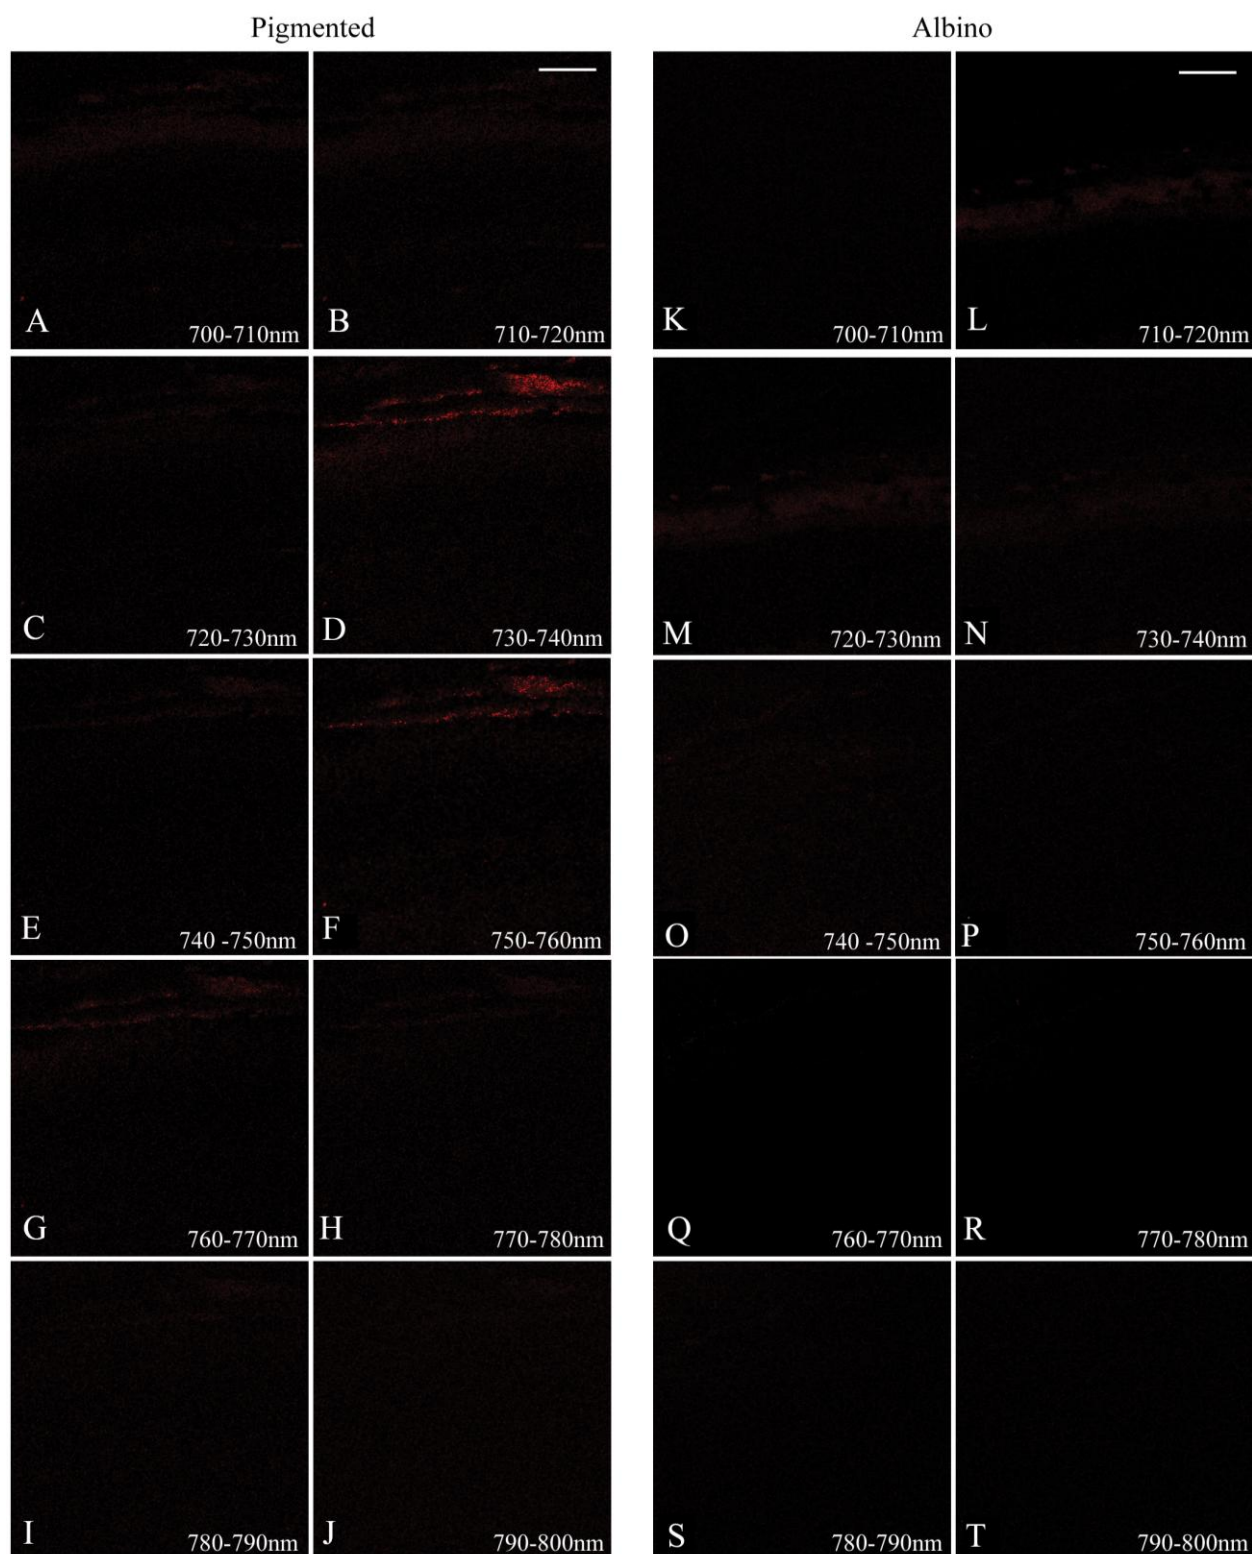

**Supplementary Figure S1.** Confocal spectral detection of AF(ex.633) in mouse pigmented (left) and albino (right) retina/RPE sections. Emission wavelengths are 700-710nm (**A, K**) 710-720nm (**B, L**) 720-730nm (**C, M**) 730-740nm (**D, N**) 740-750nm (**E, O**) 750-760 (**F, P**) 760-770nm (**G, Q**) 770-780nm (**H, R**) 780-790nm (**I, S**) 790-800nm (**J, T**). Scale bar = 25 $\mu$ m.
