# Supplementary material
Source: PubMed Central journal article supplement (PMC2884175)
Supplement: NIHMS107734-supplement-Supp_2.pdf [file NIHMS107734-supplement-Supp_2.pdf]

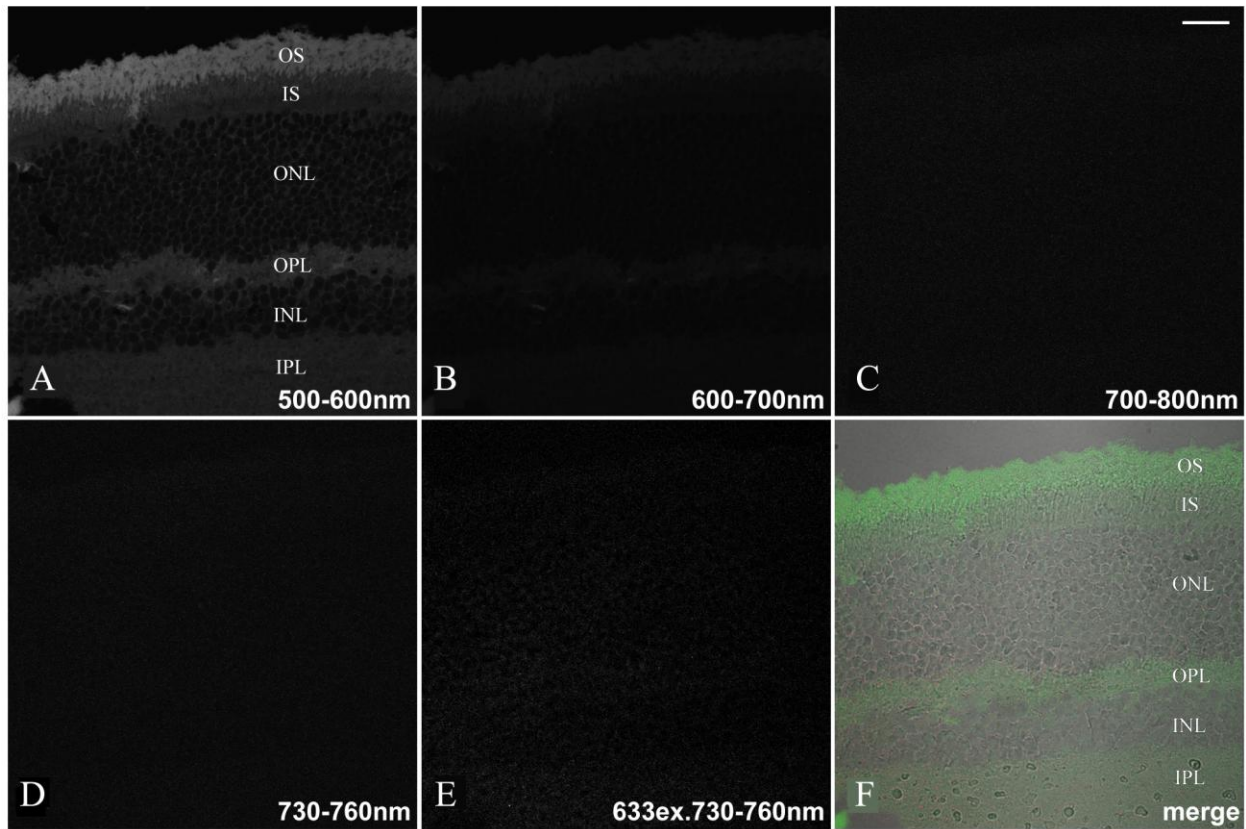

**Supplementary Figure S2.** AF(ex.488) images from mouse retinal sections. Emission wavelengths are 500-600nm (**A**), 600-700nm (**B**), 700-800nm (**C**) and 730-760nm (**D, F**). (**E**) A peak AF(ex.633) image is shown for comparison; no AF is evident. (**F**) A merged image comparing the localization of peak AF(ex.488) (green), peak AF(ex.633) (none visible), and retinal organization (DIC). Scale bar = 25 $\mu$ m.
