# Supplementary material
Source: PubMed Central journal article supplement (PMC2884175)
Supplement: NIHMS107734-supplement-Supp_3.pdf [file NIHMS107734-supplement-Supp_3.pdf]

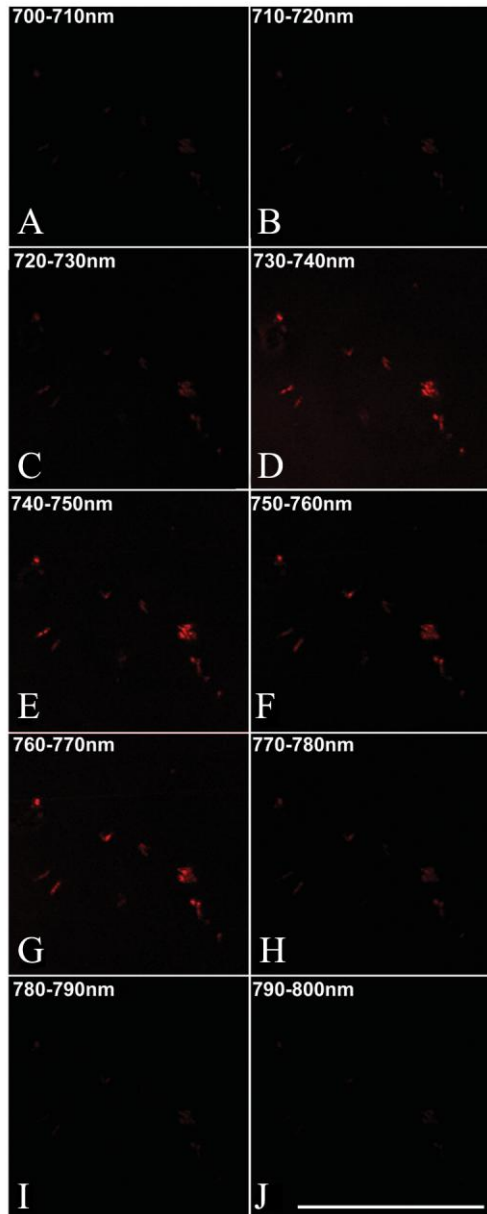

**Supplementary Figure S3.** AF(ex.633) SDCM images from isolated mouse melanosomes.

Emission wavelengths are 700-710nm (**A**), 710-720nm (**B**), 720-730nm (**C**), 730-740nm (**D**), 740-750nm (**E**), 750-760nm (**F**), 760-770nm (**G**), 770-780nm (**H**), 780-790nm (**I**), 790-800nm (**J**). Scale bar = 25 $\mu$ m.
