# Supplementary material
Source: PubMed Central journal article supplement (PMC2884175)
Supplement: NIHMS107734-supplement-Supp_4.pdf [file NIHMS107734-supplement-Supp_4.pdf]

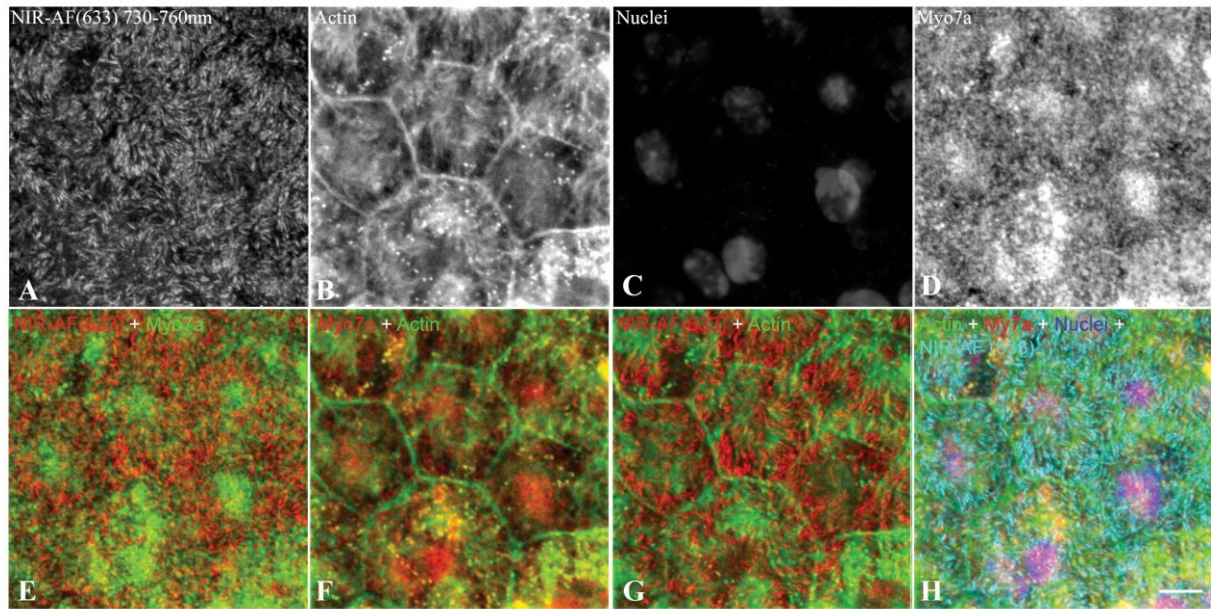

**Supplementary Figure S4.** Multi channel SDCM imaging of AF(ex.633) in whole mount eyecups from pigmented control animals. Single optical sections of AF(ex.633) emitting between 730-760nm (**A**), F-actin labeled with FITC-phalloidin (**B**), nuclei labeled with DAPI (**C**) and Myo7a labeled with Alexa Fluor 594 (**D**) were acquired from the apical RPE region using SDCM. Co-localization between pairs of fluorochromes are shown for AF(ex.633) and Myo7a (**E**), Myo7a and Actin (**F**) and AF(ex.633) and Actin (**G**). A pseudocolored four channel merged image (**H**) demonstrates the localization of all fluorochromes. Scale bar = 25 $\mu$ m.
